# Supplementary material
Source: PubMed Central journal article supplement (PMC7875463)
Supplement: NIHMS1664336-supplement-Supplementary_Materials.pdf [file NIHMS1664336-supplement-Supplementary_Materials.pdf]

One-Carbon Metabolism–Related Micronutrients Intake and Risk for Hepatocellular Carcinoma: A  
Prospective Cohort Study

Samuel O. Antwi, Jessica L. Petrick, Peter T. Campbell, Daniel A. Norez, Victoria L. Stevens, Linda M. Liao,  
Lewis R. Roberts, Tushar Patel, Katherine A. McGlynn

**Table of Contents:**

Supplementary Table 1: Association between one-carbon-related micronutrients and HCC risk by sex.....page 1-2

Supplementary Table 2: Association between one-carbon-related micronutrients and HCC risk by BMI.....page 3-4

Supplementary Table 3: Association of one-carbon-related micronutrients and HCC risk by alcohol intake...page 5-6

Supplementary Table 4: Association of one-carbon-related micronutrients and HCC by physical activity.....page 7-8

**Supplementary Table 1.** Simultaneous evaluation of total <sup>a</sup> intake of one-carbon metabolism-related micronutrients and hepatocellular carcinoma risk among participants with >3years of follow-up, stratified by sex

| Micronutrient <sup>a</sup>        | Male (N=267,670, cases: 457) |       |                          | Female (N=185,612, cases: 102) |       |                          |
|-----------------------------------|------------------------------|-------|--------------------------|--------------------------------|-------|--------------------------|
|                                   | Total N                      | Cases | HR (95% CI) <sup>b</sup> | Total N                        | Cases | HR (95% CI) <sup>b</sup> |
| <b>Folate</b>                     |                              |       |                          |                                |       |                          |
| Q1                                | 61747                        | 123   | 1.00 (ref)               | 28929                          | 22    | 1.00 (ref)               |
| Q2                                | 50624                        | 84    | 0.94 (0.69-1.27)         | 40053                          | 18    | 0.54 (0.28-1.06)         |
| Q3                                | 49223                        | 82    | 0.99 (0.72-1.37)         | 41454                          | 27    | 0.73 (0.38-1.40)         |
| Q4                                | 50870                        | 86    | 1.05 (0.75-1.49)         | 39807                          | 21    | 0.53 (0.26-1.10)         |
| Q5                                | 55206                        | 82    | 0.95 (0.64-1.40)         | 35471                          | 14    | <b>0.31 (0.12-0.75)</b>  |
| <i>P-trend</i> <sup>c</sup>       |                              |       | 0.92                     |                                |       | <b>0.04</b>              |
| <i>P-interaction</i> <sup>d</sup> |                              |       |                          |                                |       | 0.30                     |
| <b>Methionine <sup>e</sup></b>    |                              |       |                          |                                |       |                          |
| Q1                                | 37,878                       | 57    | 1.00 (ref)               | 53,208                         | 30    | 1.00 (ref)               |
| Q2                                | 46,985                       | 73    | 1.02 (0.71-1.46)         | 43,625                         | 20    | 0.76 (0.41-1.41)         |
| Q3                                | 53,942                       | 88    | 1.01 (0.70-1.44)         | 37,125                         | 24    | 0.95 (0.48-1.87)         |
| Q4                                | 60,372                       | 108   | 1.01 (0.69-1.47)         | 30,382                         | 16    | 0.69 (0.29-1.62)         |
| Q5                                | 68,493                       | 131   | 0.82 (0.51-1.32)         | 21,374                         | 12    | 0.53 (0.16-1.82)         |
| <i>P-trend</i> <sup>c</sup>       |                              |       | 0.61                     |                                |       | 0.49                     |
| <i>P-interaction</i> <sup>d</sup> |                              |       |                          |                                |       | 0.65                     |
| <b>Vitamin B2</b>                 |                              |       |                          |                                |       |                          |
| Q1                                | 58659                        | 98    | 1.00 (ref)               | 32018                          | 20    | 1.00 (ref)               |
| Q2                                | 54161                        | 98    | 1.16 (0.84-1.60)         | 36514                          | 19    | 1.02 (0.49-2.11)         |
| Q3                                | 55637                        | 90    | 0.98 (0.63-1.53)         | 35043                          | 13    | 1.25 (0.43-3.62)         |
| Q4                                | 49351                        | 81    | 0.96 (0.53-1.72)         | 41325                          | 26    | 2.94 (0.72-11.94)        |
| Q5                                | 49862                        | 90    | 0.74 (0.37-1.47)         | 40814                          | 24    | 1.78 (0.34-9.32)         |
| <i>P-trend</i> <sup>c</sup>       |                              |       | 0.65                     |                                |       | 0.37                     |
| <i>P-interaction</i> <sup>d</sup> |                              |       |                          |                                |       | 0.51                     |
| <b>Vitamin B3</b>                 |                              |       |                          |                                |       |                          |
| Q1                                | 53151                        | 102   | 1.00 (ref)               | 37527                          | 27    | 1.00 (ref)               |
| Q2                                | 56769                        | 105   | 0.93 (0.69-1.26)         | 33903                          | 18    | 0.73 (0.37-1.41)         |
| Q3                                | 55392                        | 83    | <b>0.53 (0.34-0.81)</b>  | 35289                          | 16    | <b>0.44 (0.30-0.94)</b>  |
| Q4                                | 50118                        | 68    | <b>0.35 (0.19-0.63)</b>  | 40557                          | 21    | <b>0.40 (0.38-0.66)</b>  |
| Q5                                | 52240                        | 99    | <b>0.43 (0.22-0.85)</b>  | 38438                          | 20    | <b>0.39 (0.22-0.52)</b>  |
| <i>P-trend</i> <sup>c</sup>       |                              |       | <b>0.01</b>              |                                |       | <b>0.003</b>             |
| <i>P-interaction</i> <sup>d</sup> |                              |       |                          |                                |       | 0.24                     |
| <b>Vitamin B6</b>                 |                              |       |                          |                                |       |                          |
| Q1                                | 58049                        | 108   | 1.00 (ref)               | 32630                          | 17    | 1.00 (ref)               |
| Q2                                | 54436                        | 92    | 1.02 (0.73-1.42)         | 36239                          | 22    | 1.51 (0.72-3.16)         |
| Q3                                | 55236                        | 84    | 1.18 (0.73-1.89)         | 35440                          | 15    | 1.85 (0.64-5.38)         |
| Q4                                | 49139                        | 83    | 1.72 (0.89-3.33)         | 41539                          | 22    | 3.05 (0.70-13.21)        |
| Q5                                | 50810                        | 90    | 1.67 (0.75-3.72)         | 39866                          | 26    | <b>6.21 (1.12-34.45)</b> |
| <i>P-trend</i> <sup>c</sup>       |                              |       | 0.17                     |                                |       | <b>0.005</b>             |
| <i>P-interaction</i> <sup>d</sup> |                              |       |                          |                                |       | 0.13                     |
| <b>Vitamin B12</b>                |                              |       |                          |                                |       |                          |
| Q1                                | 56871                        | 96    | 1.00 (ref)               | 33805                          | 24    | 1.00 (ref)               |
| Q2                                | 54814                        | 84    | 0.92 (0.66-1.27)         | 35864                          | 18    | 0.66 (0.33-1.33)         |
| Q3                                | 55347                        | 96    | 1.20 (0.81-1.78)         | 35330                          | 13    | 0.38 (0.13-1.09)         |
| Q4                                | 49841                        | 74    | 1.25 (0.74-2.10)         | 40835                          | 18    | 0.32 (0.09-1.15)         |
| Q5                                | 50797                        | 107   | 1.76 (0.97-3.18)         | 39880                          | 29    | 0.57 (0.14-2.37)         |
| <i>P-trend</i> <sup>c</sup>       |                              |       | 0.05                     |                                |       | 0.83                     |
| <i>P-interaction</i> <sup>d</sup> |                              |       |                          |                                |       | 0.35                     |

**Supplementary Table 1.** Continued

|                                    | Male<br>N=295,239 (cases: 530) |       |                         | Female<br>N=199,621 (cases: 117) |       |                         |
|------------------------------------|--------------------------------|-------|-------------------------|----------------------------------|-------|-------------------------|
|                                    | Total N                        | Cases | HR (95% CI)             | Total N                          | Cases | HR (95% CI)             |
| Methyl-donor index <sup>f</sup>    |                                |       |                         |                                  |       |                         |
| Q1                                 | 50822                          | 85    | 1.00 (ref) <sup>e</sup> | 39855                            | 22    | 1.00 (ref) <sup>e</sup> |
| Q2                                 | 57408                          | 101   | 1.05 (0.78-<br>1.42)    | 33268                            | 17    | 1.01 (0.52-<br>1.97)    |
| Q3                                 | 52893                          | 85    | 0.95 (0.66-<br>1.35)    | 37784                            | 18    | 1.16 (0.52-<br>2.58)    |
| Q4                                 | 52389                          | 85    | 1.00 (0.66-<br>1.52)    | 38288                            | 25    | 1.79 (0.73-<br>4.39)    |
| Q5                                 | 54158                          | 101   | 1.13 (0.72-<br>1.76)    | 36519                            | 20    | 1.53 (0.58-<br>4.07)    |
| <i>P</i> -trend <sup>c</sup>       |                                |       | 0.61                    |                                  |       | 0.29                    |
| <i>P</i> -interaction <sup>d</sup> |                                |       |                         |                                  |       | 0.83                    |

Abbreviations: HR, hazard ratio; CI, confidence interval; N/A, not applicable; Q1–Q5, calorie-adjusted quintiles of micronutrients intake

<sup>a</sup> Total intake was computed as diet plus supplement use. Each micronutrient was adjusted for total calories intake by the residual method. Quintiles were created from intake values at baseline and categorized based on distribution in the entire cohort using the 20<sup>th</sup>, 40<sup>th</sup>, 60<sup>th</sup>, and 80<sup>th</sup> percentile values as cut points.

<sup>b</sup> All models adjusted for age (continuous), race/ethnicity (White, Black, Hispanic, other), diabetes (yes, no), smoking status (never, former, current), alcohol use (<1, 1-3, >3 drinks/day), total calorie intake (continuous), body mass index (<25, 25-29, ≥30 kg/m<sup>2</sup>), education level (<high school, high school graduate, some college/post-high school education, college graduate/post-graduate), physical activity (0, <1, 1-2, 3-4, 5+ times per week), multivitamin use (yes, no), red meat intake (0-23, 24-41, 42-63, 64-99, >99 grams/day), and the healthy eating index scores (10-59, 60-66, 67-71, 72-76, >76)

<sup>c</sup> *P*-trend were calculated by treating the quintile variable as a continuous variable

<sup>e</sup> Methionine intake levels were based on dietary intake only because data on supplemental use was not available

<sup>f</sup> A separate model was fitted for the methyl-donor index, adjusting for the factors listed in <sup>b</sup>.

**Supplementary Table 2.** Simultaneous evaluation of total <sup>a</sup> intake of one-carbon metabolism-related micronutrients and risk of hepatocellular carcinoma (N=453,384), stratified by body mass index

| Micronutrient <sup>a</sup>        | < 25 kg/m <sup>2</sup> (N=157,059, cases: 125) |       |                          | ≥ 25 kg/m <sup>2</sup> (N=285546, cases: 420) |       |                          |
|-----------------------------------|------------------------------------------------|-------|--------------------------|-----------------------------------------------|-------|--------------------------|
|                                   | Total N                                        | Cases | HR (95% CI) <sup>b</sup> | Total N                                       | Cases | HR (95% CI) <sup>b</sup> |
| <b>Total folate</b>               |                                                |       |                          |                                               |       |                          |
| Q1                                | 27852                                          | 32    | 1.00 (ref)               | 60694                                         | 110   | 1.00 (ref)               |
| Q2                                | 29496                                          | 12    | 0.45 (0.23-0.91)         | 58951                                         | 87    | 0.96 (0.71-1.31)         |
| Q3                                | 31145                                          | 31    | 1.16 (0.65-2.06)         | 57482                                         | 74    | 0.87 (0.62-1.21)         |
| Q4                                | 32772                                          | 30    | 1.07 (0.58-1.97)         | 55849                                         | 76    | 0.92 (0.65-1.30)         |
| Q5                                | 35794                                          | 20    | 0.60 (0.30-1.22)         | 52570                                         | 73    | 0.88 (0.61-1.27)         |
| <i>P-trend</i> <sup>c</sup>       |                                                |       | 0.80                     |                                               |       | 0.42                     |
| <i>P-interaction</i> <sup>d</sup> |                                                |       |                          |                                               |       | 0.28                     |
| <b>Methionine <sup>e</sup></b>    |                                                |       |                          |                                               |       |                          |
| Q1                                | 37,858                                         | 26    | 1.00 (ref)               | 50,531                                        | 59    | 1.00 (ref)               |
| Q2                                | 34,982                                         | 23    | 0.87 (0.48-1.56)         | 53,474                                        | 68    | 0.99 (0.69-1.42)         |
| Q3                                | 32,413                                         | 24    | 0.87 (0.46-1.63)         | 56,649                                        | 85    | 1.06 (0.74-1.53)         |
| Q4                                | 28,878                                         | 26    | 0.91 (0.45-1.81)         | 60,001                                        | 94    | 0.98 (0.66-1.46)         |
| Q5                                | 22,928                                         | 26    | 0.78 (0.31-1.97)         | 64,891                                        | 114   | 0.85 (0.51-1.39)         |
| <i>P-trend</i> <sup>c</sup>       |                                                |       | 0.80                     |                                               |       | 0.67                     |
| <i>P-interaction</i> <sup>d</sup> |                                                |       |                          |                                               |       | 0.73                     |
| <b>Vitamin B2</b>                 |                                                |       |                          |                                               |       |                          |
| Q1                                | 29570                                          | 21    | 1.00 (ref)               | 58726                                         | 95    | 1.00 (ref)               |
| Q2                                | 28882                                          | 28    | 2.01 (1.05-3.85)         | 59604                                         | 86    | 0.96 (0.68-1.34)         |
| Q3                                | 31489                                          | 24    | 1.42 (0.55-3.64)         | 57044                                         | 77    | 0.89 (0.57-1.39)         |
| Q4                                | 33343                                          | 25    | 1.05 (0.33-3.39)         | 55357                                         | 79    | 1.14 (0.63-2.05)         |
| Q5                                | 33775                                          | 27    | 0.67 (0.18-2.54)         | 54815                                         | 83    | 0.86 (0.42-1.68)         |
| <i>P-trend</i> <sup>c</sup>       |                                                |       | 0.71                     |                                               |       | 0.34                     |
| <i>P-interaction</i> <sup>d</sup> |                                                |       |                          |                                               |       | 0.25                     |
| <b>Vitamin B3</b>                 |                                                |       |                          |                                               |       |                          |
| Q1                                | 30211                                          | 22    | 1.00 (ref)               | 57903                                         | 102   | 1.00 (ref)               |
| Q2                                | 28764                                          | 26    | 1.44 (0.77-2.68)         | 59811                                         | 96    | 0.80 (0.59-1.09)         |
| Q3                                | 31144                                          | 23    | 1.10 (0.46-2.66)         | 57344                                         | 74    | <b>0.40 (0.26-0.62)</b>  |
| Q4                                | 33639                                          | 27    | 0.98 (0.32-3.03)         | 55114                                         | 61    | <b>0.23 (0.13-0.43)</b>  |
| Q5                                | 33301                                          | 27    | 0.78 (0.22-2.82)         | 55374                                         | 87    | <b>0.25 (0.13-0.50)</b>  |
| <i>P-trend</i> <sup>c</sup>       |                                                |       | 0.99                     |                                               |       | <b>&lt;0.0001</b>        |
| <i>P-interaction</i> <sup>d</sup> |                                                |       |                          |                                               |       | 0.28                     |
| <b>Vitamin B6</b>                 |                                                |       |                          |                                               |       |                          |
| Q1                                | 28039                                          | 29    | 1.00 (ref)               | 60321                                         | 92    | 1.00 (ref)               |
| Q2                                | 29123                                          | 18    | 0.47 (0.24-0.92)         | 59383                                         | 93    | <b>1.39 (0.99-1.95)</b>  |
| Q3                                | 31769                                          | 22    | 0.52 (0.21-1.28)         | 56712                                         | 77    | <b>1.82 (1.14-2.91)</b>  |
| Q4                                | 33488                                          | 29    | 0.77 (0.23-2.53)         | 55189                                         | 73    | <b>2.82 (1.46-5.46)</b>  |
| Q5                                | 34640                                          | 27    | 0.67 (0.16-2.85)         | 53941                                         | 85    | <b>3.58 (1.62-7.91)</b>  |
| <i>P-trend</i> <sup>c</sup>       |                                                |       | 0.36                     |                                               |       | <b>0.0006</b>            |
| <i>P-interaction</i> <sup>d</sup> |                                                |       |                          |                                               |       | 0.08                     |
| <b>Vitamin B12</b>                |                                                |       |                          |                                               |       |                          |
| Q1                                | 32510                                          | 28    | 1.00 (ref)               | 55712                                         | 88    | 1.00 (ref)               |
| Q2                                | 28415                                          | 20    | 0.75 (0.40-1.41)         | 60094                                         | 80    | 0.93 (0.67-1.30)         |
| Q3                                | 31338                                          | 19    | 0.68 (0.30-1.57)         | 57193                                         | 89    | 1.22 (0.81-1.82)         |
| Q4                                | 33208                                          | 22    | 0.95 (0.36-2.53)         | 55535                                         | 66    | 1.10 (0.65-1.89)         |
| Q5                                | 31588                                          | 36    | 2.62 (0.95-7.25)         | 57012                                         | 97    | 1.50 (0.83-2.69)         |
| <i>P-trend</i> <sup>c</sup>       |                                                |       | 0.08                     |                                               |       | 0.19                     |
| <i>P-interaction</i> <sup>d</sup> |                                                |       |                          |                                               |       | 0.11                     |

**Supplementary Table 2.** Continued

| Micronutrient <sup>a</sup>         | < 25 kg/m <sup>2</sup> (N=157,059, cases: 125) |       |                         | ≥ 25 kg/m <sup>2</sup> (N=285546, cases: 420) |       |                         |
|------------------------------------|------------------------------------------------|-------|-------------------------|-----------------------------------------------|-------|-------------------------|
|                                    | Total N                                        | Cases | HR (95% CI)             | Total N                                       | Cases | HR (95% CI)             |
| Methyl-donor index <sup>f</sup>    |                                                |       |                         |                                               |       |                         |
| Q1                                 | 30419                                          | 22    | 1.00 (ref) <sup>e</sup> | 57782                                         | 82    | 1.00 (ref) <sup>e</sup> |
| Q2                                 | 28852                                          | 20    | 0.91 (0.49-1.72)        | 59743                                         | 95    | 1.06 (0.78-1.44)        |
| Q3                                 | 31934                                          | 25    | 1.09 (0.54-2.20)        | 56572                                         | 77    | 0.95 (0.66-1.38)        |
| Q4                                 | 33075                                          | 33    | 1.39 (0.63-3.07)        | 55637                                         | 74    | 0.99 (0.64-1.54)        |
| Q5                                 | 32779                                          | 25    | 1.03 (0.43-2.47)        | 55812                                         | 92    | 1.20 (0.75-1.91)        |
| <i>P</i> -trend <sup>c</sup>       |                                                |       | 0.81                    |                                               |       | 0.46                    |
| <i>P</i> -interaction <sup>d</sup> |                                                |       |                         |                                               |       | 0.39                    |

Abbreviations: HR, hazard ratio; CI, confidence interval; N/A, not applicable; Q1–Q5, calorie-adjusted quintiles of micronutrients intake

<sup>a</sup> Total intake was computed as diet plus supplement use. Each micronutrient was adjusted for total calories intake by the residual method. Quintiles were created from intake values at baseline and categorized based on distribution in the entire cohort using the 20<sup>th</sup>, 40<sup>th</sup>, 60<sup>th</sup>, and 80<sup>th</sup> percentile values as cut points.

<sup>b</sup> All models adjusted for age (continuous), sex, race/ethnicity (White, Black, Hispanic, other), diabetes (yes, no), smoking status (never, former, current), alcohol use (<1, 1-3, >3 drinks/day), total calorie intake (continuous), education level (<high school, high school graduate, some college/post-high school education, college graduate/post-graduate), physical activity (0, <1, 1-2, 3-4, 5+ times per week), multivitamin use (yes, no), red meat intake (0-23, 24-41, 42-63, 64-99, >99 grams/day), and the healthy eating index scores (10-59, 60-66, 67-71, 72-76, >76)

<sup>c</sup> *P*-trend were calculated by treating the quintile variable as a continuous variable

<sup>e</sup> Methionine intake levels were based on dietary intake only because data on supplemental use was not available

<sup>f</sup> A separate model was fitted for the methyl-donor index, adjusting for the factors listed in <sup>b</sup>.

**Supplementary Table 3.** Total <sup>a</sup> intake of one-carbon metabolism-related nutrients and risk of hepatocellular carcinoma among individuals with more than 3 years of follow-up (N=453,384), stratified by the number of drinks consumed per day

| Micronutrient <sup>a</sup>        | Non-drinkers<br>N=110,169 (cases: 179) |       |                          | < 1drink/day<br>N=240,258 (cases: 240) |       |                          | 1-3 drinks/day<br>N=69,465 (cases: 69) |       |                          | >3 drinks/day<br>N=33,492 (cases: 71) |       |                          |
|-----------------------------------|----------------------------------------|-------|--------------------------|----------------------------------------|-------|--------------------------|----------------------------------------|-------|--------------------------|---------------------------------------|-------|--------------------------|
|                                   | Total N                                | Cases | HR (95% CI) <sup>b</sup> | Total N                                | Cases | HR (95% CI) <sup>b</sup> | Total N                                | Cases | HR (95% CI) <sup>b</sup> | Total N                               | Cases | HR (95% CI) <sup>b</sup> |
| Folate                            |                                        |       |                          |                                        |       |                          |                                        |       |                          |                                       |       |                          |
| Q1                                | 19827                                  | 35    | 1.00 (ref)               | 37843                                  | 44    | 1.00 (ref)               | 14883                                  | 17    | 1.00 (ref)               | 18123                                 | 49    | 1.00 (ref)               |
| Q2                                | 22139                                  | 28    | 0.74 (0.44-1.26)         | 48457                                  | 56    | 1.16 (0.76-1.76)         | 14544                                  | 13    | 1.05 (0.49-2.24)         | 5537                                  | 5     | 0.37 (0.14-0.95)         |
| Q3                                | 22036                                  | 38    | 1.02 (0.61-1.70)         | 51390                                  | 49    | 0.96 (0.61-1.50)         | 13459                                  | 13    | 1.41 (0.63-3.14)         | 3792                                  | 9     | 0.93 (0.43-2.02)         |
| Q4                                | 22284                                  | 43    | 1.13 (0.67-1.90)         | 52231                                  | 48    | 0.90 (0.56-1.44)         | 13116                                  | 13    | 1.70 (0.73-3.93)         | 3046                                  | 3     | 0.40 (0.12-1.36)         |
| Q5                                | 23883                                  | 35    | 0.78 (0.43-1.36)         | 50337                                  | 43    | 0.78 (0.47-1.30)         | 13463                                  | 13    | 1.84 (0.74-4.62)         | 2994                                  | 5     | 0.72 (0.25-2.03)         |
| <i>P-trend</i> <sup>c</sup>       |                                        |       | 0.69                     |                                        |       | 0.21                     |                                        |       | 0.13                     |                                       |       | 0.34                     |
| <i>P-interaction</i> <sup>d</sup> |                                        |       |                          |                                        |       |                          |                                        |       |                          |                                       |       | 0.29                     |
| Methionine <sup>e</sup>           |                                        |       |                          |                                        |       |                          |                                        |       |                          |                                       |       |                          |
| Q1                                | 25742                                  | 32    | 1.00 (ref)               | 49978                                  | 36    | 1.00 (ref)               | 10830                                  | 9     | 1.00 (ref)               | 4536                                  | 10    | 1.00 (ref)               |
| Q2                                | 21797                                  | 33    | 1.09 (0.65-1.83)         | 49842                                  | 38    | 0.85 (0.53-1.36)         | 13487                                  | 11    | 1.03 (0.41-2.60)         | 5484                                  | 11    | 0.91 (0.38-2.17)         |
| Q3                                | 20791                                  | 37    | 1.13 (0.66-1.96)         | 49094                                  | 48    | 0.88 (0.55-1.43)         | 14645                                  | 13    | 1.16 (0.44-3.05)         | 6537                                  | 14    | 1.04 (0.44-2.44)         |
| Q4                                | 20488                                  | 39    | 1.08 (0.58-2.00)         | 47301                                  | 55    | 0.84 (0.50-1.41)         | 15415                                  | 17    | 1.40 (0.49-4.01)         | 7550                                  | 13    | 0.83 (0.33-2.07)         |
| Q5                                | 21351                                  | 38    | 0.77 (0.33-1.78)         | 44043                                  | 63    | 0.61 (0.30-1.24)         | 15088                                  | 19    | 1.63 (0.41-6.41)         | 9385                                  | 23    | 1.09 (0.39-2.99)         |
| <i>P-trend</i> <sup>c</sup>       |                                        |       | 0.91                     |                                        | 36    | 0.36                     |                                        |       | 0.45                     |                                       |       | 0.98                     |
| <i>P-interaction</i> <sup>d</sup> |                                        |       |                          |                                        |       |                          |                                        |       |                          |                                       |       | 0.97                     |
| Vitamin B2                        |                                        |       |                          |                                        |       |                          |                                        |       |                          |                                       |       |                          |
| Q1                                | 20143                                  | 32    | 1.00 (ref)               | 42237                                  | 39    | 1.00 (ref)               | 15796                                  | 18    | 1.00 (ref)               | 12501                                 | 29    | 1.00 (ref)               |
| Q2                                | 23214                                  | 33    | 0.95 (0.55-1.64)         | 50154                                  | 58    | 1.39 (0.88-2.20)         | 12934                                  | 13    | 1.08 (0.48-2.45)         | 4373                                  | 13    | 1.12 (0.51-2.45)         |
| Q3                                | 21877                                  | 34    | 1.15 (0.57-2.31)         | 46828                                  | 44    | 1.25 (0.67-2.32)         | 14038                                  | 10    | 0.89 (0.24-3.27)         | 7937                                  | 15    | 0.61 (0.20-1.84)         |
| Q4                                | 22091                                  | 35    | 1.37 (0.54-3.47)         | 51394                                  | 49    | 1.30 (0.58-2.89)         | 13514                                  | 16    | 1.24 (0.25-6.12)         | 3677                                  | 7     | 0.73 (0.17-3.07)         |
| Q5                                | 22844                                  | 45    | 0.97 (0.33-2.86)         | 49645                                  | 50    | 1.01 (0.40-2.57)         | 13183                                  | 12    | 0.66 (0.10-4.36)         | 5004                                  | 7     | 0.78 (0.14-4.53)         |
| <i>P-trend</i> <sup>c</sup>       |                                        |       | 0.83                     |                                        |       | 0.74                     |                                        |       | 0.89                     |                                       |       | 0.53                     |
| <i>P-interaction</i> <sup>d</sup> |                                        |       |                          |                                        |       |                          |                                        |       |                          |                                       |       | 0.80                     |
| Vitamin B3                        |                                        |       |                          |                                        |       |                          |                                        |       |                          |                                       |       |                          |
| Q1                                | 24504                                  | 43    | 1.00 (ref)               | 43523                                  | 48    | 1.00 (ref)               | 13008                                  | 16    | 1.00 (ref)               | 9643                                  | 22    | 1.00 (ref)               |
| Q2                                | 21653                                  | 34    | 0.75 (0.46-1.23)         | 49613                                  | 60    | 1.00 (0.66-1.52)         | 14057                                  | 15    | 0.87 (0.40-1.89)         | 5349                                  | 14    | 0.89 (0.40-1.99)         |
| Q3                                | 21467                                  | 29    | 0.46 (0.23-0.93)         | 47352                                  | 37    | 0.50 (0.27-0.90)         | 13856                                  | 12    | 0.48 (0.14-1.66)         | 8006                                  | 21    | 0.63 (0.22-1.77)         |
| Q4                                | 21077                                  | 27    | 0.33 (0.13-0.85)         | 50281                                  | 40    | 0.39 (0.17-0.87)         | 14342                                  | 14    | 0.25 (0.05-1.20)         | 4975                                  | 8     | 0.25 (0.06-1.05)         |
| Q5                                | 21468                                  | 46    | 0.40 (0.14-1.14)         | 49489                                  | 55    | 0.53 (0.21-1.32)         | 14202                                  | 12    | 0.11 (0.02-0.69)         | 5519                                  | 6     | 0.31 (0.02-1.75)         |
| <i>P-trend</i> <sup>c</sup>       |                                        |       | 0.09                     |                                        |       | 0.14                     |                                        |       | 0.05                     |                                       |       | 0.12                     |
| <i>P-interaction</i> <sup>d</sup> |                                        |       |                          |                                        |       |                          |                                        |       |                          |                                       |       | 0.11                     |

Supplementary Table 3. Continued

| Micronutrient <sup>a</sup>       | Non-drinkers<br>N=110,169 (cases: 179) |       |                          | < 1drink/day<br>N=240,258 (cases: 240) |       |                          | 1-3 drinks/day<br>N=69,465 (cases: 69) |       |                          | >3 drinks/day<br>N=33,492 (cases: 71) |       |                          |
|----------------------------------|----------------------------------------|-------|--------------------------|----------------------------------------|-------|--------------------------|----------------------------------------|-------|--------------------------|---------------------------------------|-------|--------------------------|
|                                  | Total N                                | Cases | HR (95% CI) <sup>b</sup> | Total N                                | Cases | HR (95% CI) <sup>b</sup> | Total N                                | Cases | HR (95% CI) <sup>b</sup> | Total N                               | Cases | HR (95% CI) <sup>b</sup> |
| Vitamin B6                       |                                        |       |                          |                                        |       |                          |                                        |       |                          |                                       |       |                          |
| Q1                               | 21926                                  | 35    | 1.00 (ref)               | 44836                                  | 48    | 1.00 (ref)               | 14071                                  | 21    | 1.00 (ref)               | 9846                                  | 21    | 1.00 (ref)               |
| Q2                               | 22531                                  | 35    | 1.02 (0.60-1.76)         | 49035                                  | 55    | 1.28 (0.82-2.01)         | 13708                                  | 10    | 0.47 (0.19-1.13)         | 5401                                  | 14    | 1.64 (0.72-3.73)         |
| Q3                               | 21922                                  | 32    | 1.24 (0.60-2.57)         | 47237                                  | 39    | 1.44 (0.76-2.73)         | 13564                                  | 10    | 0.52 (0.14-1.97)         | 7953                                  | 18    | 2.20 (0.73-6.64)         |
| Q4                               | 21127                                  | 31    | 1.47 (0.53-4.12)         | 50062                                  | 50    | 2.45 (0.99-5.94)         | 14444                                  | 13    | 0.65 (0.11-3.77)         | 5045                                  | 11    | <b>5.46 (1.23-24.23)</b> |
| Q5                               | 22663                                  | 46    | 1.72 (0.52-5.73)         | 49088                                  | 48    | 2.13 (0.73-6.24)         | 13678                                  | 15    | 1.42 (0.19-10.75)        | 5247                                  | 7     | <b>7.38 (1.02-53.20)</b> |
| <i>P-trend<sup>c</sup></i>       |                                        |       | 0.26                     |                                        |       | 0.16                     |                                        |       | 0.95                     |                                       |       | <b>0.04</b>              |
| <i>P-interaction<sup>d</sup></i> |                                        |       |                          |                                        |       |                          |                                        |       |                          |                                       |       | 0.68                     |
| Vitamin B12                      |                                        |       |                          |                                        |       |                          |                                        |       |                          |                                       |       |                          |
| Q1                               | 22761                                  | 35    | 1.00 (ref)               | 42564                                  | 44    | 1.00 (ref)               | 14143                                  | 15    | 1.00 (ref)               | 11208                                 | 26    | 1.00 (ref)               |
| Q2                               | 22625                                  | 33    | 0.93 (0.54-1.58)         | 49990                                  | 45    | 0.80 (0.51-1.27)         | 13112                                  | 13    | 0.97 (0.43-2.18)         | 4951                                  | 11    | 0.87 (0.40-1.89)         |
| Q3                               | 21619                                  | 33    | 1.01 (0.52-1.96)         | 47513                                  | 48    | 1.11 (0.65-1.92)         | 14136                                  | 10    | 0.80 (0.27-2.34)         | 7409                                  | 18    | 1.16 (0.49-2.77)         |
| Q4                               | 21267                                  | 26    | 0.87 (0.37-2.07)         | 50481                                  | 44    | 1.26 (0.61-2.58)         | 14102                                  | 13    | 1.30 (0.35-4.87)         | 4826                                  | 9     | 0.98 (0.31-3.11)         |
| Q5                               | 21897                                  | 52    | 1.71 (0.68-4.28)         | 49710                                  | 59    | 1.59 (0.73-3.48)         | 13972                                  | 18    | 2.61 (0.65-10.47)        | 5098                                  | 7     | 0.76 (0.19-3.05)         |
| <i>P-trend<sup>c</sup></i>       |                                        |       | 0.24                     |                                        |       | 0.30                     |                                        |       | 0.21                     |                                       |       | 0.87                     |
| <i>P-interaction<sup>d</sup></i> |                                        |       |                          |                                        |       |                          |                                        |       |                          |                                       |       | 0.28                     |
| Methyl-donor index <sup>e</sup>  |                                        |       |                          |                                        |       |                          |                                        |       |                          |                                       |       |                          |
| Q1                               | 23380                                  | 34    | 1.00 (ref)               | 45760                                  | 39    | 1.00 (ref)               | 13055                                  | 16    | 1.00 (ref)               | 8482                                  | 18    | 1.00 (ref)               |
| Q2                               | 21720                                  | 33    | 0.94 (0.57-1.56)         | 48555                                  | 56    | 1.26 (0.82-1.94)         | 13960                                  | 10    | 0.55 (0.24-1.27)         | 6441                                  | 19    | 1.20 (0.61-2.35)         |
| Q3                               | 21719                                  | 32    | 0.96 (0.54-1.72)         | 47965                                  | 41    | 1.15 (0.68-1.92)         | 13830                                  | 14    | 0.80 (0.32-2.00)         | 7163                                  | 16    | 0.84 (0.38-1.87)         |
| Q4                               | 21241                                  | 37    | 1.19 (0.61-2.34)         | 49390                                  | 48    | 1.49 (0.82-2.72)         | 14347                                  | 13    | 0.73 (0.24-2.20)         | 5699                                  | 12    | 0.72 (0.28-1.82)         |
| Q5                               | 22109                                  | 43    | 1.30 (0.63-2.67)         | 48588                                  | 56    | 1.72 (0.91-3.26)         | 14273                                  | 16    | 0.93 (0.29-2.97)         | 5707                                  | 6     | 0.32 (0.10-1.01)         |
| <i>P-trend<sup>c</sup></i>       |                                        |       | 0.38                     |                                        |       | 0.09                     |                                        |       | 0.93                     |                                       |       | 0.05                     |
| <i>P-interaction<sup>d</sup></i> |                                        |       |                          |                                        |       |                          |                                        |       |                          |                                       |       | 0.14                     |

Abbreviations: HR, hazard ratio; CI, confidence interval; N/A, not applicable; Q1–Q5, calorie-adjusted quintiles of micronutrients intake

<sup>a</sup> Total intake was computed as diet plus supplement use. Each micronutrient was adjusted for total calories intake by the residual method. Quintiles were created from intake values at baseline and categorized based on distribution in the entire cohort using the 20<sup>th</sup>, 40<sup>th</sup>, 60<sup>th</sup>, and 80<sup>th</sup> percentile values as cut points.

<sup>b</sup> All models adjusted for age (continuous), sex, race/ethnicity (White, Black, Hispanic, other), diabetes (yes, no), smoking status (never, former, current), total calorie intake (continuous), body mass index (<25, 25-29, ≥30 kg/m<sup>2</sup>), education level (<high school, high school graduate, some college/post-high school education, college graduate/post-graduate), physical activity (0, <1, 1-2, 3-4, 5+ times per week), multivitamin use (yes, no), red meat intake (0-23, 24-41, 42-63, 64-99, >99 grams/day), and the healthy eating index scores (10-59, 60-66, 67-71, 72-76, >76)

<sup>c</sup> *P-trend* were calculated by treating the quintile variable as a continuous variable

<sup>e</sup> Methionine intake levels were based on dietary intake only because data on supplemental use was not available

<sup>e</sup> A separate model was fitted for the methyl-donor index, adjusting for the factors listed in <sup>b</sup>.

**Supplementary Table 4.** Total <sup>a</sup> intake of one-carbon metabolism nutrients and risk of hepatocellular carcinoma among individuals with more than 3 years of follow-up (N=453,384), stratified by level physical activity per week

| Micronutrient <sup>a</sup>        | 0<br>N=19,320 (cases: 28) |       |                           | < 1 per week<br>N=122,095 (cases: 177) |       |                          | 1-2 per week<br>N=97,816 (cases: 126) |       |                          | 3-4 per week<br>N=121,856 (cases: 146) |       |                          | 5+ per week<br>N=87,438 (cases: 74) |       |                          |
|-----------------------------------|---------------------------|-------|---------------------------|----------------------------------------|-------|--------------------------|---------------------------------------|-------|--------------------------|----------------------------------------|-------|--------------------------|-------------------------------------|-------|--------------------------|
|                                   | Total N                   | Cases | HR (95% CI) <sup>b</sup>  | Total N                                | Cases | HR (95% CI) <sup>b</sup> | Total N                               | Cases | HR (95% CI) <sup>b</sup> | Total N                                | Cases | HR (95% CI) <sup>b</sup> | Total N                             | Cases | HR (95% CI) <sup>b</sup> |
| <b>Folate</b>                     |                           |       |                           |                                        |       |                          |                                       |       |                          |                                        |       |                          |                                     |       |                          |
| Q1                                | 5900                      | 7     | 1.00 (ref)                | 31734                                  | 59    | 1.00 (ref)               | 20014                                 | 28    | 1.00 (ref)               | 18877                                  | 36    | 1.00 (ref)               | 13088                               | 13    | 1.00 (ref)               |
| Q2                                | 4323                      | 7     | 1.70 (0.55-5.29)          | 27956                                  | 37    | 0.85 (0.52-1.38)         | 20501                                 | 26    | 1.17 (0.66-2.08)         | 22538                                  | 21    | 0.63 (0.35-1.11)         | 14305                               | 10    | 0.69 (0.29-1.63)         |
| Q3                                | 3347                      | 4     | 1.36 (0.35-5.24)          | 24295                                  | 33    | 0.68 (0.39-1.17)         | 20368                                 | 26    | 1.30 (0.71-2.36)         | 25306                                  | 23    | 0.66 (0.36-1.19)         | 16440                               | 21    | 1.26 (0.58-2.75)         |
| Q4                                | 2979                      | 2     | 0.62 (0.11-3.47)          | 21093                                  | 24    | 0.72 (0.40-1.28)         | 19559                                 | 30    | 1.64 (0.89-3.03)         | 27205                                  | 31    | 0.84 (0.47-1.49)         | 19008                               | 19    | 0.97 (0.42-2.22)         |
| Q5                                | 2771                      | 8     | 2.17 (0.56-8.43)          | 17017                                  | 24    | 0.85 (0.52-1.38)         | 17374                                 | 16    | 0.95 (0.45-1.98)         | 27930                                  | 35    | 0.90 (0.49-1.64)         | 24597                               | 11    | 0.41 (0.15-1.07)         |
| <i>P-trend</i> <sup>c</sup>       |                           |       | 0.81                      |                                        |       | 0.24                     |                                       |       | 0.78                     |                                        |       | 0.94                     |                                     |       | 0.18                     |
| <i>P-interaction</i> <sup>d</sup> |                           |       |                           |                                        |       |                          |                                       |       |                          |                                        |       |                          |                                     |       | 0.09                     |
| <b>Methionine <sup>e</sup></b>    |                           |       |                           |                                        |       |                          |                                       |       |                          |                                        |       |                          |                                     |       |                          |
| Q1                                | 4966                      | 2     | 1.00 (ref)                | 27444                                  | 26    | 1.00 (ref)               | 18759                                 | 23    | 1.00 (ref)               | 22822                                  | 18    | 1.00 (ref)               | 15498                               | 15    | 1.00 (ref)               |
| Q2                                | 3704                      | 2     | 1.22 (0.16-9.09)          | 25224                                  | 32    | 1.17 (0.68-1.99)         | 19439                                 | 16    | 0.58 (0.30-1.12)         | 24758                                  | 27    | 1.23 (0.67-2.29)         | 16621                               | 16    | 0.86 (0.41-1.80)         |
| Q3                                | 3457                      | 6     | 3.32 (0.59-18.55)         | 23970                                  | 39    | 1.30 (0.76-2.24)         | 19817                                 | 27    | 0.83 (0.44-1.54)         | 25308                                  | 24    | 0.96 (0.50-1.87)         | 17718                               | 13    | 0.54 (0.23-1.23)         |
| Q4                                | 3411                      | 6     | 2.79 (0.46-17.07)         | 23049                                  | 34    | 0.99 (0.54-1.81)         | 20258                                 | 31    | 0.81 (0.40-1.61)         | 25215                                  | 35    | 1.22 (0.62-2.42)         | 18057                               | 17    | 0.58 (0.24-1.40)         |
| Q5                                | 3782                      | 12    | 4.55 (0.58-35.93)         | 22408                                  | 46    | 0.92 (0.44-1.92)         | 19543                                 | 29    | 0.55 (0.21-1.39)         | 23753                                  | 42    | 1.17 (0.50-2.75)         | 19544                               | 13    | <b>0.26 (0.07-0.92)</b>  |
| <i>P-trend</i> <sup>c</sup>       |                           |       | 0.10                      |                                        |       | 0.78                     |                                       |       | 0.55                     |                                        |       | 0.68                     |                                     |       | 0.06                     |
| <i>P-interaction</i> <sup>d</sup> |                           |       |                           |                                        |       |                          |                                       |       |                          |                                        |       |                          |                                     |       | 0.32                     |
| <b>Vitamin B2</b>                 |                           |       |                           |                                        |       |                          |                                       |       |                          |                                        |       |                          |                                     |       |                          |
| Q1                                | 5225                      | 6     | 1.00 (ref)                | 29059                                  | 45    | 1.00 (ref)               | 19601                                 | 22    | 1.00 (ref)               | 20790                                  | 36    | 1.00 (ref)               | 14823                               | 8     | 1.00 (ref)               |
| Q2                                | 4000                      | 4     | 1.68 (0.42-6.69)          | 25573                                  | 44    | 1.16 (0.72-1.89)         | 20058                                 | 27    | 1.40 (0.73-2.69)         | 23783                                  | 28    | 0.72 (0.41-1.27)         | 16172                               | 12    | 1.96 (0.73-5.29)         |
| Q3                                | 3789                      | 6     | 6.57 (1.48-29.25)         | 24561                                  | 32    | 0.75 (0.38-1.48)         | 20094                                 | 22    | 1.17 (0.48-2.83)         | 24354                                  | 24    | 0.56 (0.25-1.23)         | 16951                               | 18    | 3.61 (1.06-12.28)        |
| Q4                                | 3154                      | 6     | <b>19.34 (2.24-166.7)</b> | 21424                                  | 24    | 0.83 (0.33-2.05)         | 19088                                 | 25    | 1.17 (0.37-3.65)         | 26813                                  | 33    | 0.82 (0.29-2.29)         | 19410                               | 17    | 2.07 (0.45-9.52)         |
| Q5                                | 3152                      | 6     | <b>30.47 (2.71-342.1)</b> | 21478                                  | 32    | 0.80 (0.28-2.33)         | 18975                                 | 30    | 0.87 (0.23-3.25)         | 26116                                  | 25    | 0.46 (0.13-1.56)         | 20082                               | 19    | 1.04 (0.18-5.98)         |
| <i>P-trend</i> <sup>c</sup>       |                           |       | <b>0.005</b>              |                                        |       | 0.50                     |                                       |       | 0.80                     |                                        |       | 0.21                     |                                     |       | 0.81                     |
| <i>P-interaction</i> <sup>d</sup> |                           |       |                           |                                        |       |                          |                                       |       |                          |                                        |       |                          |                                     |       | 0.12                     |
| <b>Vitamin B3</b>                 |                           |       |                           |                                        |       |                          |                                       |       |                          |                                        |       |                          |                                     |       |                          |
| Q1                                | 5608                      | 10    | 1.00 (ref)                | 28539                                  | 45    | 1.00 (ref)               | 19130                                 | 30    | 1.00 (ref)               | 20758                                  | 32    | 1.00 (ref)               | 15212                               | 12    | 1.00 (ref)               |
| Q2                                | 3958                      | 5     | 0.93 (0.28-3.08)          | 26021                                  | 47    | 0.99 (0.63-1.57)         | 20162                                 | 24    | 0.61 (0.34-1.10)         | 23760                                  | 29    | 0.78 (0.45-1.36)         | 15821                               | 15    | 1.19 (0.51-2.78)         |
| Q3                                | 3617                      | 3     | 0.93 (0.17-5.04)          | 24507                                  | 33    | <b>0.47 (0.24-0.91)</b>  | 20135                                 | 20    | <b>0.47 (0.21-0.66)</b>  | 24313                                  | 31    | 0.74 (0.36-1.49)         | 17213                               | 10    | 0.32 (0.08-1.23)         |
| Q4                                | 3132                      | 5     | 1.72 (0.15-19.3)          | 21957                                  | 24    | <b>0.35 (0.14-0.87)</b>  | 19496                                 | 20    | <b>0.51 (0.24-0.76)</b>  | 26379                                  | 24    | 0.44 (0.16-1.18)         | 18935                               | 14    | 0.21 (0.04-1.06)         |
| Q5                                | 3005                      | 5     | 2.33 (0.17-32.9)          | 21071                                  | 28    | <b>0.25 (0.12-0.75)</b>  | 18893                                 | 32    | <b>0.45 (0.14-0.65)</b>  | 26646                                  | 30    | 0.55 (0.18-1.65)         | 20257                               | 23    | 0.31 (0.05-1.75)         |
| <i>P-trend</i> <sup>c</sup>       |                           |       | 0.60                      |                                        |       | <b>0.01</b>              |                                       |       | <b>0.008</b>             |                                        |       | 0.27                     |                                     |       | 0.33                     |
| <i>P-interaction</i> <sup>d</sup> |                           |       |                           |                                        |       |                          |                                       |       |                          |                                        |       |                          |                                     |       | 0.93                     |



**Supplementary Table 4. Continued**

| Nutrient <sup>a</sup>             | 0<br>N=19,320 (cases: 28) |       |                          | < 1 per week<br>N=122,095 (cases: 177) |       |                          | 1-2 per week<br>N=97,816 (cases: 126) |       |                          | 3-4 per week<br>N=121,856 (cases: 146) |       |                          | 5+ per week<br>N=87,438 (cases: 74) |       |                          |
|-----------------------------------|---------------------------|-------|--------------------------|----------------------------------------|-------|--------------------------|---------------------------------------|-------|--------------------------|----------------------------------------|-------|--------------------------|-------------------------------------|-------|--------------------------|
|                                   | Total N                   | Cases | HR (95% CI) <sup>b</sup> | Total N                                | Cases | HR (95% CI) <sup>b</sup> | Total N                               | Cases | HR (95% CI) <sup>b</sup> | Total N                                | Cases | HR (95% CI) <sup>b</sup> | Total N                             | Cases | HR (95% CI) <sup>b</sup> |
| Vitamin B6                        |                           |       |                          |                                        |       |                          |                                       |       |                          |                                        |       |                          |                                     |       |                          |
| Q1                                | 5791                      | 12    | 1.00 (ref)               | 31398                                  | 43    | 1.00 (ref)               | 20248                                 | 29    | 1.00 (ref)               | 19138                                  | 28    | 1.00 (ref)               | 12937                               | 12    | 1.00 (ref)               |
| Q2                                | 3788                      | 3     | 0.19 (0.04-0.82)         | 25245                                  | 43    | 1.50 (0.91-2.45)         | 20037                                 | 23    | 0.95 (0.50-1.79)         | 24224                                  | 31    | 1.40 (0.77-2.55)         | 16320                               | 11    | 0.63 (0.25-1.59)         |
| Q3                                | 3792                      | 3     | 0.13 (0.02-0.87)         | 24217                                  | 39    | 2.23 (1.12-4.42)         | 19870                                 | 18    | 1.18 (0.46-3.00)         | 24507                                  | 27    | 1.63 (0.73-3.62)         | 17302                               | 11    | 0.81 (0.24-2.73)         |
| Q4                                | 3108                      | 6     | 0.24 (0.02-2.81)         | 21638                                  | 24    | 2.39 (0.88-6.44)         | 19501                                 | 25    | 2.53 (0.71-8.99)         | 26893                                  | 33    | 3.34 (1.10-10.13)        | 18757                               | 15    | 1.41 (0.27-7.38)         |
| Q5                                | 2841                      | 4     | 0.07 (0.01-1.36)         | 19597                                  | 28    | 2.76 (0.79-9.63)         | 18160                                 | 31    | 3.82 (0.84-17.18)        | 27094                                  | 27    | 2.54 (0.67-9.62)         | 22122                               | 25    | 3.31 (0.51-21.30)        |
| <i>P-trend</i> <sup>c</sup>       |                           |       | 0.11                     |                                        |       | 0.04                     |                                       |       | 0.10                     |                                        |       | 0.10                     |                                     |       | 0.36                     |
| <i>P-interaction</i> <sup>d</sup> |                           |       |                          |                                        |       |                          |                                       |       |                          |                                        |       |                          |                                     |       | 0.13                     |
| Vitamin B12                       |                           |       |                          |                                        |       |                          |                                       |       |                          |                                        |       |                          |                                     |       |                          |
| Q1                                | 4775                      | 7     | 1.00 (ref)               | 25680                                  | 43    | 1.00 (ref)               | 18521                                 | 22    | 1.00 (ref)               | 22834                                  | 34    | 1.00 (ref)               | 17694                               | 13    | 1.00 (ref)               |
| Q2                                | 4210                      | 6     | 0.70 (0.20-2.47)         | 27066                                  | 35    | 0.83 (0.50-1.36)         | 20378                                 | 21    | 0.84 (0.43-1.61)         | 22888                                  | 30    | 1.07 (0.61-1.85)         | 15040                               | 8     | 0.54 (0.21-1.44)         |
| Q3                                | 3700                      | 3     | 0.31 (0.06-1.70)         | 24349                                  | 38    | 1.18 (0.65-2.11)         | 20078                                 | 24    | 1.25 (0.58-2.72)         | 24367                                  | 28    | 0.84 (0.40-1.73)         | 17276                               | 15    | 1.05 (0.36-3.10)         |
| Q4                                | 3243                      | 7     | 0.99 (0.16-6.23)         | 22434                                  | 21    | 1.01 (0.45-2.27)         | 19447                                 | 23    | 1.52 (0.56-4.09)         | 26243                                  | 22    | 0.58 (0.22-1.49)         | 18497                               | 17    | 1.51 (0.40-5.66)         |
| Q5                                | 3392                      | 5     | 0.50 (0.06-4.22)         | 22566                                  | 40    | 1.97 (0.85-4.59)         | 19392                                 | 36    | 2.16 (0.74-6.32)         | 25524                                  | 32    | 1.06 (0.38-2.94)         | 18931                               | 21    | 1.81 (0.41-7.92)         |
| <i>P-trend</i> <sup>c</sup>       |                           |       | 0.66                     |                                        |       | 0.22                     |                                       |       | 0.14                     |                                        |       | 0.96                     |                                     |       | 0.40                     |
| <i>P-interaction</i> <sup>d</sup> |                           |       |                          |                                        |       |                          |                                       |       |                          |                                        |       |                          |                                     |       | 0.76                     |
| Methyl-donor index <sup>e</sup>   |                           |       |                          |                                        |       |                          |                                       |       |                          |                                        |       |                          |                                     |       |                          |
| Q1                                | 5663                      | 8     | 1.00 (ref)               | 31264                                  | 40    | 1.00 (ref)               | 19667                                 | 22    | 1.00 (ref)               | 19994                                  | 27    | 1.00 (ref)               | 12729                               | 9     | 1.00 (ref)               |
| Q2                                | 3814                      | 4     | 0.56 (0.16-1.95)         | 25061                                  | 47    | 1.20 (0.77-1.88)         | 20336                                 | 28    | 1.19 (0.66-2.15)         | 24018                                  | 26    | 0.77 (0.44-1.34)         | 16511                               | 11    | 0.98 (0.39-2.43)         |
| Q3                                | 3843                      | 5     | 0.91 (0.25-3.28)         | 24676                                  | 35    | 0.91 (0.52-1.57)         | 19906                                 | 18    | 0.80 (0.38-1.68)         | 24490                                  | 27    | 0.91 (0.48-1.70)         | 16818                               | 17    | 1.48 (0.56-3.89)         |
| Q4                                | 3091                      | 5     | 1.59 (0.35-7.31)         | 21342                                  | 25    | 0.70 (0.36-1.37)         | 19495                                 | 25    | 1.25 (0.55-2.82)         | 26558                                  | 35    | 1.30 (0.63-2.68)         | 19445                               | 17    | 1.32 (0.42-4.11)         |
| Q5                                | 2909                      | 6     | 1.61 (0.30-8.59)         | 19752                                  | 30    | 0.81 (0.41-1.63)         | 18412                                 | 33    | 1.73 (0.74-4.03)         | 26796                                  | 31    | 1.08 (0.49-2.41)         | 21935                               | 20    | 1.53 (0.46-5.04)         |
| <i>P-trend</i> <sup>c</sup>       |                           |       | 0.48                     |                                        |       | 0.36                     |                                       |       | 0.15                     |                                        |       | 0.62                     |                                     |       | 0.49                     |
| <i>P-interaction</i> <sup>d</sup> |                           |       |                          |                                        |       |                          |                                       |       |                          |                                        |       |                          |                                     |       | 0.74                     |

Abbreviations: HR, hazard ratio; CI, confidence interval; N/A, not applicable; Q1–Q5, calorie-adjusted quintiles of micronutrients intake

<sup>a</sup> Total intake was computed as diet plus supplement use. Each micronutrient was adjusted for total calories intake by the residual method. Quintiles were created from intake values at baseline and categorized based on distribution in the entire cohort using the 20<sup>th</sup>, 40<sup>th</sup>, 60<sup>th</sup>, and 80<sup>th</sup> percentile values as cut points.

<sup>b</sup> All models adjusted for age (continuous), sex, race/ethnicity (White, Black, Hispanic, other), diabetes (yes, no), smoking status (never, former, current), alcohol use (<1, 1-3, >3 drinks/day), total calorie intake (continuous), body mass index (<25, 25-29, ≥30 kg/m<sup>2</sup>), education level (<high school, high school graduate, some college/post-high school education, college graduate/post-graduate), multivitamin use (yes, no), red meat intake (0-23, 24-41, 42-63, 64-99, >99 grams/day), and the healthy eating index scores (10-59, 60-66, 67-71, 72-76, >76)

<sup>c</sup> *P-trend* were calculated by treating the quintile variable as a continuous variable

<sup>e</sup> Methionine intake levels were based on dietary intake only because data on supplemental use was not available

<sup>e</sup> A separate model was fitted for the methyl-donor index, adjusting for the factors listed in <sup>b</sup>.
